# Supplementary material
Source: PubMed Central journal article supplement (PMC7772253)
Supplement: NIHMS1629303-supplement-Fig__S1.pdf [file NIHMS1629303-supplement-Fig__S1.pdf]

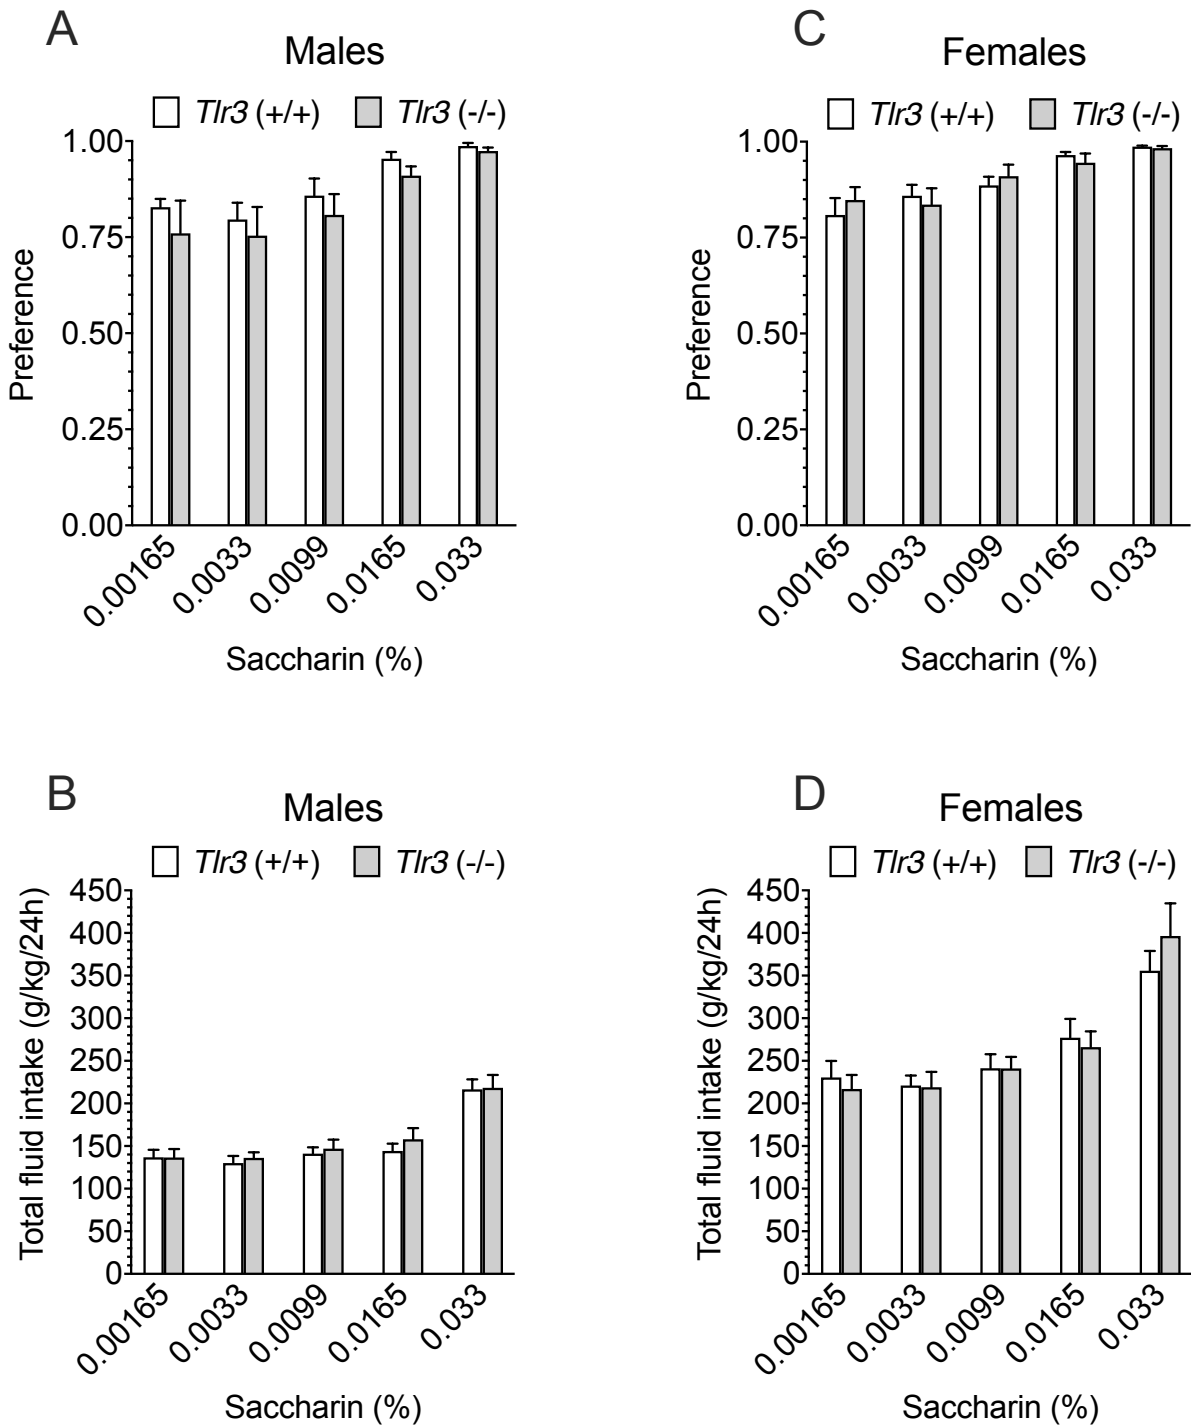

**Figure S1. Preference for saccharin is similar in *Tlr3*<sup>+/+</sup> and *Tlr3*<sup>-/-</sup> mice.** Preference for saccharin in (A) male (n = 10 per genotype) and (C) female (n = 10 per genotype) *Tlr3*<sup>+/+</sup> and *Tlr3*<sup>-/-</sup> mice. Total fluid intake in (B) male and (D) female *Tlr3*<sup>+/+</sup> and *Tlr3*<sup>-/-</sup> mice.
