# Supplementary material
Source: PubMed Central journal article supplement (PMC7772253)
Supplement: NIHMS1629303-supplement-Fig__S2.pdf [file NIHMS1629303-supplement-Fig__S2.pdf]

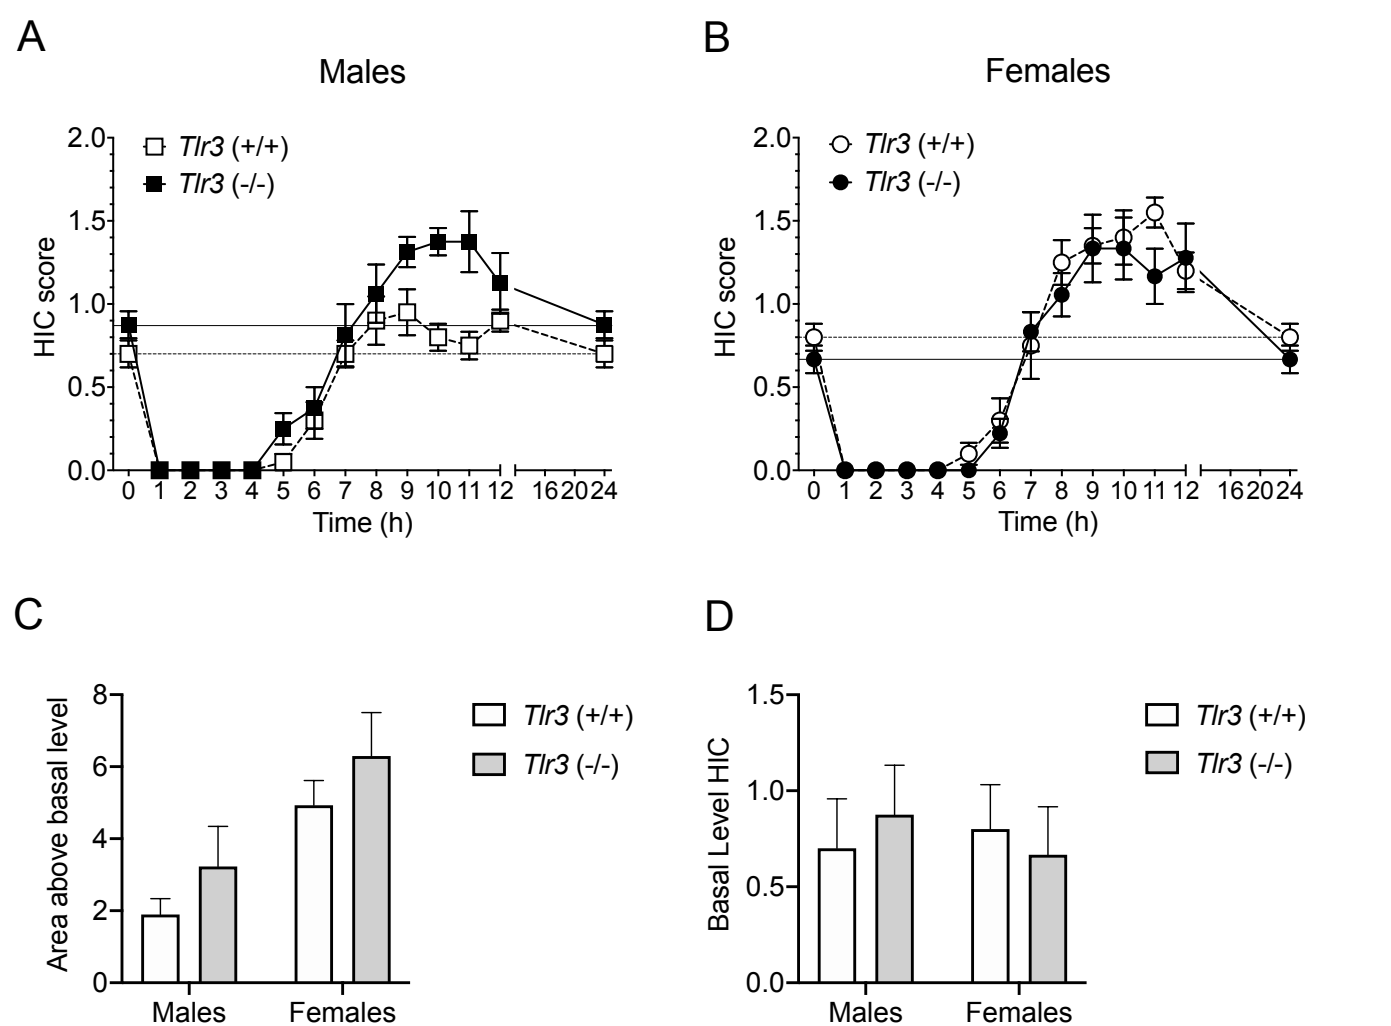

**Figure S2.** *Tlr3*<sup>+/+</sup> and *Tlr3*<sup>-/-</sup> mice have similar handling-induced convulsions (HIC) during acute ethanol withdrawal. HIC scores were measured every hour after administration of ethanol (4 g/kg, i.p.). Horizontal lines represent the basal HIC levels for *Tlr3*<sup>+/+</sup> (dashed line) and *Tlr3*<sup>-/-</sup> (solid line) mice. HIC scores in (A) male (n = 8-10 per genotype) and (B) female (n = 9-10 per genotype) *Tlr3*<sup>+/+</sup> and *Tlr3*<sup>-/-</sup> mice. (C) Areas under the curves (above basal levels) in male and female mice. (D) Basal HIC levels in male and female mice.
