# Supplementary material
Source: PubMed Central journal article supplement (PMC7772253)
Supplement: NIHMS1629303-supplement-Fig__S3.pdf [file NIHMS1629303-supplement-Fig__S3.pdf]

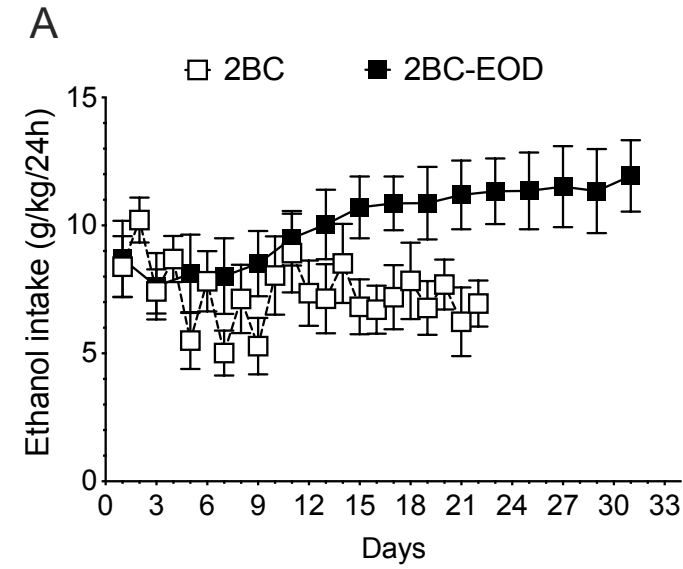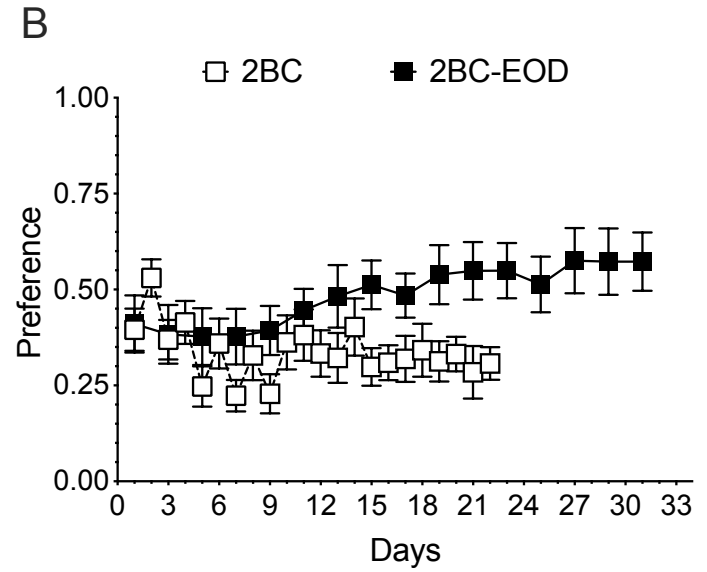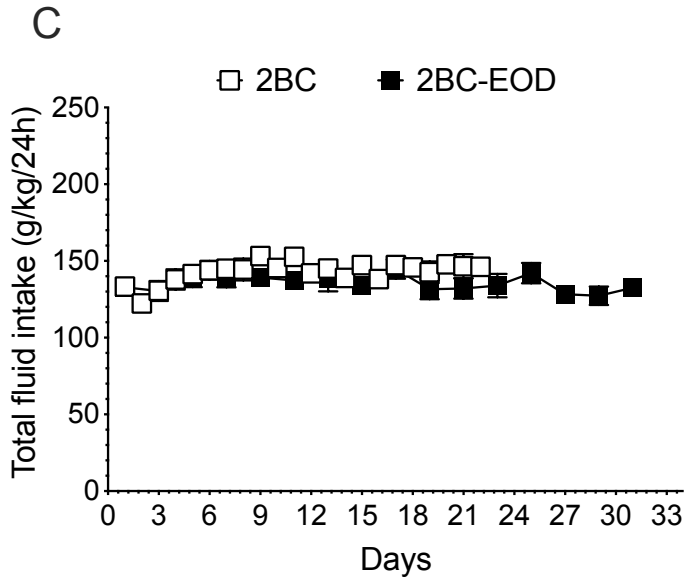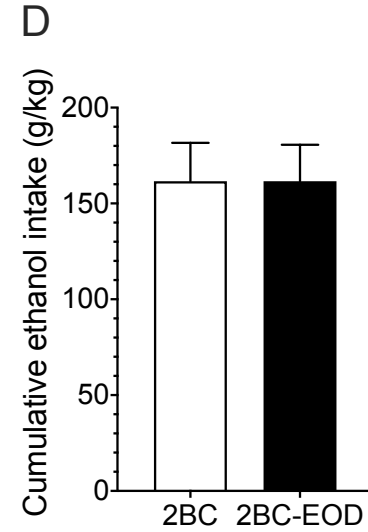

**Figure S3. Ethanol consumption during the 2BC and 2BC-EOD procedures.** (A) Ethanol (15% v/v) intake, (B) preference for ethanol, (C) total fluid intake, and (D) cumulative ethanol intake over the course of the 2BC and 2BC-EOD procedures in male C57BL/6J mice (n = 10 per group). 2BC, two-bottle choice; 2BC-EOD, two-bottle choice every-other-day.
