# Supplementary material
Source: PubMed Central journal article supplement (PMC7772253)
Supplement: NIHMS1629303-supplement-Table_S1.pdf [file NIHMS1629303-supplement-Table_S1.pdf]

Table S1. Two-way repeated measures ANOVA for the intermittent access, two-bottle choice every-other-day (2BC-EOD) drinking procedure in *Tlr3*<sup>+/+</sup> and *Tlr3*<sup>-/-</sup> mice.

| Sex<br>(number of<br>animals)          | Ethanol<br>(v/v) | Factors                           | 2BC-EOD Procedure                 |                                   |                                  |
|----------------------------------------|------------------|-----------------------------------|-----------------------------------|-----------------------------------|----------------------------------|
|                                        |                  |                                   | Ethanol Intake (g/kg/24h)         | Ethanol Preference                | Total Fluid Intake<br>(g/kg/24h) |
| Males<br>(n=10 per<br>genotype)        | 15%              | Genotype                          | <b>F(1,18)=4.567; P=0.0466</b>    | <b>F(1,18)=9.351; P=0.0068</b>    | <b>F(1,18)=10.95; P=0.0039</b>   |
|                                        |                  | Drinking<br>session               | <b>F(5,90)=4.553; P=0.0010</b>    | <b>F(5,90)=4.667; P=0.0008</b>    | <b>F(5,90)=3.004; P=0.0149</b>   |
|                                        |                  | Genotype x<br>Drinking<br>session | F(5,90)=1.170; P=0.3300           | F(5,90)=0.8452; P=0.5213          | F(5,90)=0.6184; P=0.6861         |
|                                        | 20%              | Genotype                          | <b>F(1,18)=4.995; P=0.0383</b>    | <b>F(1,18)=7.866; P=0.0117</b>    | <b>F(1,18)=7.039; P=0.0162</b>   |
|                                        |                  | Drinking<br>session               | F(4,72)=1.973; P=0.1077           | <b>F(4,72)=2.866; P=0.0291</b>    | <b>F(4,72)=3.473; P=0.0119</b>   |
|                                        |                  | Genotype x<br>Drinking<br>session | F(4,72)=2.382; P=0.0594           | <b>F(4,72)=3.291; P=0.0155</b>    | F(4,72)=2.358; P=0.0615          |
| Females<br>(n=9-10<br>per<br>genotype) | 15%              | Genotype                          | F(1,17)=0.3884; P=0.5414          | F(1,17)=0.1791; P=0.6775          | F(1,17)=0.002579;<br>P=0.9601    |
|                                        |                  | Drinking<br>session               | <b>F(5,85)=12.20; P&lt;0.0001</b> | <b>F(5,85)=12.81; P&lt;0.0001</b> | <b>F(5,85)=2.946; P=0.0168</b>   |
|                                        |                  | Genotype x<br>Drinking<br>session | F(5,85)=1.472; P=0.2073           | <b>F(5,85)=2.403; P=0.0435</b>    | <b>F(5,85)=2.690; P=0.0263</b>   |
|                                        | 20%              | Genotype                          | F(1,17)=0.7900; P=0.3865          | F(1,17)=0.2859; P=0.5998          | F(1,17)=0.5828; P=0.4557         |
|                                        |                  | Drinking<br>session               | <b>F(4,68)=4.429; P=0.0031</b>    | F(4,68)=0.3742; P=0.8263          | <b>F(4,68)=6.744; P=0.0001</b>   |
|                                        |                  | Genotype x<br>Drinking<br>session | F(4,68)=1.428; P=0.2342           | F(4,68)=1.867; P=0.1263           | <b>F(4,68)=2.963; P=0.0256</b>   |

Statistically significant results are in bold font. Ethanol concentration was 15% then 20% v/v for a total of 22 drinking sessions with every-other-day access for 24 h.
