# Supplementary material
Source: PubMed Central journal article supplement (PMC7772253)
Supplement: NIHMS1629303-supplement-Table_S2.pdf [file NIHMS1629303-supplement-Table_S2.pdf]

Table S2. Three-way repeated measures ANOVA for the intermittent access, two-bottle choice every-other-day (2BC-EOD) drinking procedure in *Tlr3*<sup>+/+</sup> and *Tlr3*<sup>-/-</sup> mice.

| Factors                           | 2BC-EOD Procedure                   |                                     |                                     |
|-----------------------------------|-------------------------------------|-------------------------------------|-------------------------------------|
|                                   | Ethanol Intake (g/kg/24h)           | Ethanol Preference                  | Total Fluid Intake (g/kg/24h)       |
| Drinking session                  | <b>F(10,350)=25.53; P&lt;0.0001</b> | <b>F(10,350)=9.962; P&lt;0.0001</b> | <b>F(10,350)=11.21; P&lt;0.0001</b> |
| Genotype                          | <b>F(1,35)=33.55; P&lt;0.0001</b>   | F(1,35)=1.348; P=0.2536             | <b>F(1,35)=58.52; P&lt;0.0001</b>   |
| Sex                               | <b>F(1,35)=4.901; P=0.0334</b>      | <b>F(1,35)=7.574; P=0.0093</b>      | <b>F(1,35)=5.246; P=0.0281</b>      |
| Drinking session x Genotype       | <b>F(10,350)=2.761; P=0.0027</b>    | F(10,350)=1.418; P=0.1705           | <b>F(10,350)=2.378; P=0.0098</b>    |
| Drinking session x Sex            | F(10,350)=1.026; P=0.4204           | F(10,350)=1.002; P=0.4415           | <b>F(10,350)=2.278; P=0.0135</b>    |
| Genotype x Sex                    | F(1,35)=1.492; P=0.2301             | <b>F(1,35)=4.967; P=0.0324</b>      | <b>F(1,35)=6.792; P=0.0134</b>      |
| Drinking session x Genotype x Sex | F(10,350)=1.592; P=0.1070           | F(10,350)=1.823; P=0.0553           | F(10,350)=1.243; P=0.2620           |

Statistically significant results are in bold font. Ethanol concentration was 15% then 20% v/v for a total of 22 drinking sessions with every-other-day access for 24 h. Males (n=10 per genotype); Females (n=9-10 per genotype).
