# Supplementary material
Source: PubMed Central journal article supplement (PMC7772253)
Supplement: NIHMS1629303-supplement-Table_S3.pdf [file NIHMS1629303-supplement-Table_S3.pdf]

Table S3. Two-way repeated measures ANOVA for the continuous access, two-bottle choice (2BC) drinking procedure in *Tlr3*<sup>+/+</sup> and *Tlr3*<sup>-/-</sup> mice.

| Sex<br>(number of<br>animals)          | Factors                                | 2BC Procedure                     |                                   |                                  |
|----------------------------------------|----------------------------------------|-----------------------------------|-----------------------------------|----------------------------------|
|                                        |                                        | Ethanol Intake (g/kg/24h)         | Ethanol Preference                | Total Fluid Intake<br>(g/kg/24h) |
| Males<br>(n=9 per<br>genotype)         | Genotype                               | F(1,16)=0.01181; P=0.9148         | F(1,16)=0.7899; P=0.3873          | F(1,16)=0.2073; P=0.6550         |
|                                        | Ethanol<br>concentration               | <b>F(4,64)=41.10; P&lt;0.0001</b> | <b>F(4,64)=14.25; P&lt;0.0001</b> | F(4,64)=2.351; P=0.0634          |
|                                        | Genotype x<br>Ethanol<br>concentration | F(4,64)=2.478; P=0.0528           | F(4,64)=2.427; P=0.0568           | F(4,64)=1.840; P=0.1321          |
| Females<br>(n=9-10<br>per<br>genotype) | Genotype                               | F(1,17)=0.05449; P=0.8182         | F(1,17)=0.04493; P=0.8347         | F(1,17)=3.517; P=0.0780          |
|                                        | Ethanol<br>concentration               | <b>F(4,68)=61.78; P&lt;0.0001</b> | <b>F(4,68)=9.208; P&lt;0.0001</b> | <b>F(4,68)=2.916; P=0.0275</b>   |
|                                        | Genotype x<br>Ethanol<br>concentration | F(4,68)=1.757; P=0.1477           | F(4,68)=0.6686; P=0.6160          | F(4,68)=0.6218; P=0.6485         |

Statistically significant results are in bold font. Ethanol concentration was increased every four days from 3-15% v/v.
