# Supplementary material
Source: PubMed Central journal article supplement (PMC7772253)
Supplement: NIHMS1629303-supplement-Table_S4.pdf [file NIHMS1629303-supplement-Table_S4.pdf]

Table S4. Three-way repeated measures ANOVA for the continuous access, two-bottle choice every-other-day (2BC) drinking procedure in *Tlr3*<sup>+/+</sup> and *Tlr3*<sup>-/-</sup> mice.

| Factors                           | 2BC Procedure                      |                                    |                                   |
|-----------------------------------|------------------------------------|------------------------------------|-----------------------------------|
|                                   | Ethanol Intake (g/kg/24h)          | Ethanol Preference                 | Total Fluid Intake (g/kg/24h)     |
| Drinking session                  | <b>F(4,132)=97.60; P&lt;0.0001</b> | <b>F(4,132)=21.51; P&lt;0.0001</b> | <b>F(4,132)=4.292; P=0.0027</b>   |
| Genotype                          | <b>F(1,33)=9.090; P=0.0049</b>     | F(1,33)=0.4179; P=0.5225           | <b>F(1,33)=21.58; P&lt;0.0001</b> |
| Sex                               | F(1,33)=0.06390; P=0.8020          | F(1,33)=0.1029; P=0.7504           | F(1,33)=0.5652; P=0.4574          |
| Drinking session x Genotype       | <b>F(4,132)=8.594; P&lt;0.0001</b> | <b>F(4,132)=2.808; P=0.0282</b>    | F(4,132)=1.050; P=0.3840          |
| Drinking session x Sex            | F(4,132)=0.7139; P=0.5839          | F(4,132)=1.020; P=0.3996           | F(4,132)=1.252; P=0.2963          |
| Genotype x Sex                    | F(1,33)=0.02659; P=0.8715          | F(1,33)=0.4456; P=0.5091           | F(1,33)=2.222; P=0.1456           |
| Drinking session x Genotype x Sex | <b>F(4,132)=3.293; P=0.0131</b>    | F(4,132)=2.344; P=0.0581           | F(4,132)=0.7941; P=0.5310         |

Statistically significant results are in bold font. Ethanol concentration was increased every four days from 3-15% v/v. Males (n=9 per genotype); Females (n=9-10 per genotype).
