# Supplementary material
Source: PubMed Central journal article supplement (PMC7772253)
Supplement: NIHMS1629303-supplement-Table_S5.pdf [file NIHMS1629303-supplement-Table_S5.pdf]

Table S5. Two-way repeated measures ANOVA for the two-bottle choice (2BC), limited-access (3-hour) drinking procedure in *Tlr3*<sup>+/+</sup> and *Tlr3*<sup>-/-</sup> mice.

| Sex<br>(number of animals)     | Factors                     | 2BC-Limited Access Procedure          |                                    |                                    |
|--------------------------------|-----------------------------|---------------------------------------|------------------------------------|------------------------------------|
|                                |                             | Ethanol (15% v/v) Intake<br>(g/kg/3h) | Ethanol Preference                 | Total Fluid Intake<br>(g/kg/3h)    |
| Males<br>(n=10 per genotype)   | Genotype                    | F(1,18)=3.320; P=0.0851               | F(1,18)=0.002244; P=0.9627         | <b>F(1,18)=5.258; P=0.0341</b>     |
|                                | Drinking session            | <b>F(6,108)=3.135; P=0.0072</b>       | <b>F(6,108)=8.603; P&lt;0.0001</b> | F(6,108)=1.926; P=0.0831           |
|                                | Genotype x Drinking session | F(6,108)=1.028; P=0.4113              | <b>F(6,108)=2.231; P=0.0455</b>    | F(6,108)=0.9038; P=0.4951          |
| Females<br>(n=10 per genotype) | Genotype                    | F(1,18)=0.1597; P=0.6942              | F(1,18)=1.0;43 P=0.3206            | F(1,18)=1.233; P=0.2815            |
|                                | Drinking session            | <b>F(6,108)=10.42; P&lt;0.0001</b>    | <b>F(6,108)=16.35; P&lt;0.0001</b> | <b>F(6,108)=15.45; P&lt;0.0001</b> |
|                                | Genotype x Drinking session | F(6,108)=2.174; P=0.0510              | F(6,108)=0.4123; P=0.8695          | F(6,108)=0.6302; P=0.7057          |

Statistically significant results are in bold font. Beginning 3 h after the start of the dark cycle, 15% v/v ethanol was available for 3 h.
