# Supplementary material
Source: PubMed Central journal article supplement (PMC7772253)
Supplement: NIHMS1629303-supplement-Table_S6.pdf [file NIHMS1629303-supplement-Table_S6.pdf]

Table S6. Three-way repeated measures ANOVA for the two-bottle choice (2BC), limited-access (3-hour) drinking procedure in *Tlr3*<sup>+/+</sup> and *Tlr3*<sup>-/-</sup> mice.

| Factors                           | 2BC-Limited Access Procedure       |                                    |                                    |
|-----------------------------------|------------------------------------|------------------------------------|------------------------------------|
|                                   | Ethanol Intake (g/kg/3h)           | Ethanol Preference                 | Total Fluid Intake (g/kg/3h)       |
| Drinking session                  | <b>F(6,216)=7.646; P&lt;0.0001</b> | <b>F(6,216)=24.46; P&lt;0.0001</b> | <b>F(6,216)=10.73; P&lt;0.0001</b> |
| Genotype                          | <b>F(1,36)=4.632; P=0.0382</b>     | <b>F(1,36)=7.372; P=0.0101</b>     | F(1,36)=2.228; P=0.1443            |
| Sex                               | F(1,36)=2.031; P=0.1628            | F(1,36)=0.6757; P=0.4165           | F(1,36)=0.08544; P=0.7717          |
| Drinking session x Genotype       | <b>F(6,216)=4.789; P=0.0001</b>    | <b>F(6,216)=2.179; P=0.0461</b>    | F(6,216)=7.214; <b>P&lt;0.0001</b> |
| Drinking session x Sex            | F(6,216)=1.951; P=0.0740           | F(6,216)=1.193; P=0.3112           | F(6,216)=0.6235; P=0.7114          |
| Genotype x Sex                    | F(1,36)=0.6250; P=0.4344           | F(1,36)=0.7652; P=0.3875           | <b>F(1,36)=4.694; P=0.0370</b>     |
| Drinking session x Genotype x Sex | F(6,216)=1.074; P=0.3789           | F(6,216)=1.055; P=0.3909           | F(6,216)=0.8992; P=0.4963          |

Statistically significant results are in bold font. Beginning 3 h after the start of the dark cycle, 15% v/v ethanol was available for 3 h. Males (n=10 per genotype); Females (n=10 per genotype).
